# Supplementary material for: Moringa oleifera L. Extracts as Bioactive Ingredients That Increase Safety of Body Wash Cosmetics
Source: Hindawi journal article supplement (doi:10.1155/2020/8197902), 2020-07-01
Supplement: f1 [file 8197902.f1.pdf]

# Moringa oleifera L. extracts as bioactive ingredients that increasing safety of body wash cosmetics

Zofia Nizioł-Lukaszewska, Dominika Furman-Toczek, Tomasz Bujak, Tomasz Wasilewski, Zofia Hordyjewicz-Baran

Supplementary material contains spectra from composition analyzes using ESI-MS.

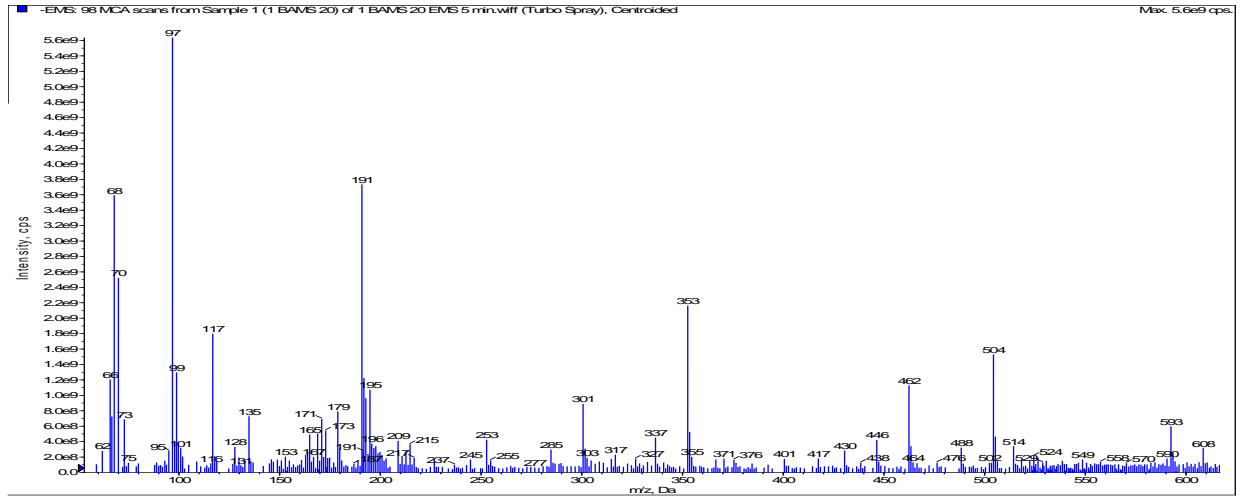

Figure 1. ESI-MS spectrum in the negative-ion mode obtained for *Moringa oleifera* extract.

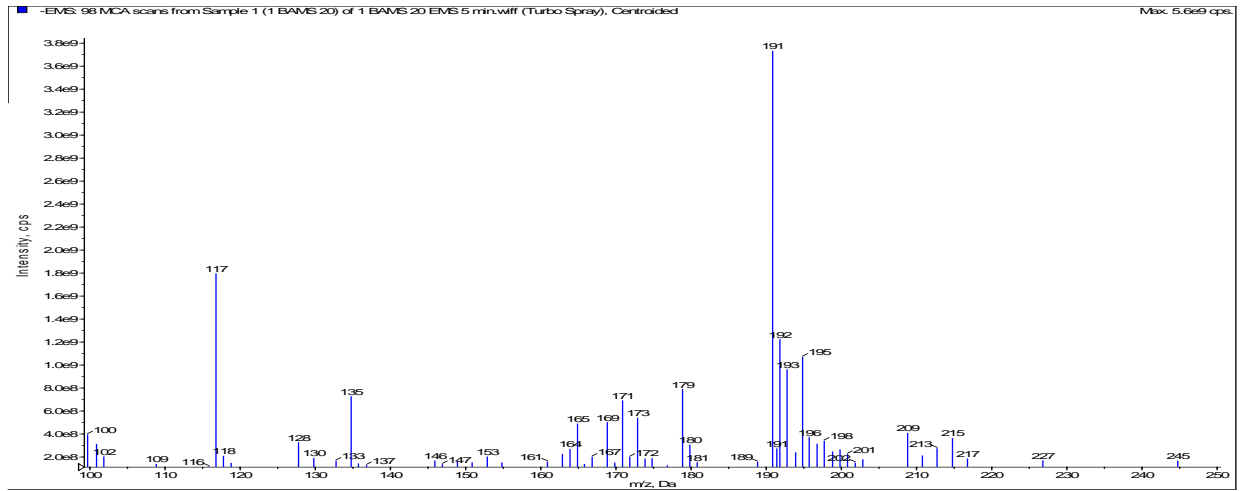

Figure 2. ESI-MS spectrum in the negative-ion mode obtained for *Moringa oleifera* extract, m/z 100-250 Da.

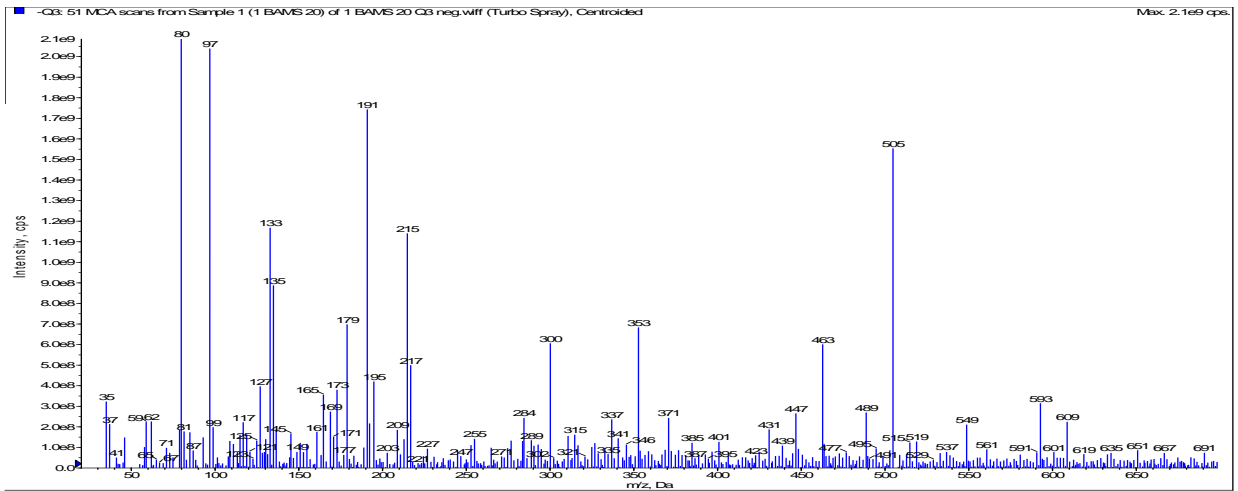

Figure 3. ESI-MS spectrum in the negative-ion mode obtained for *Moringa oleifera* extract, 80:20.

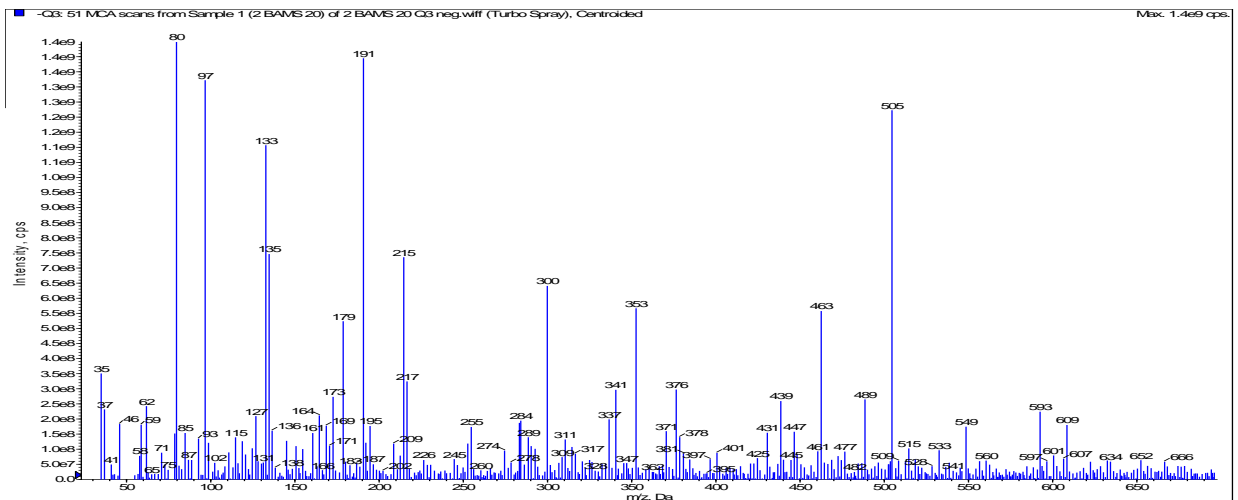

Figure 4. ESI-MS spectrum in the negative-ion mode obtained for *Moringa oleifera* extract, 60:40.

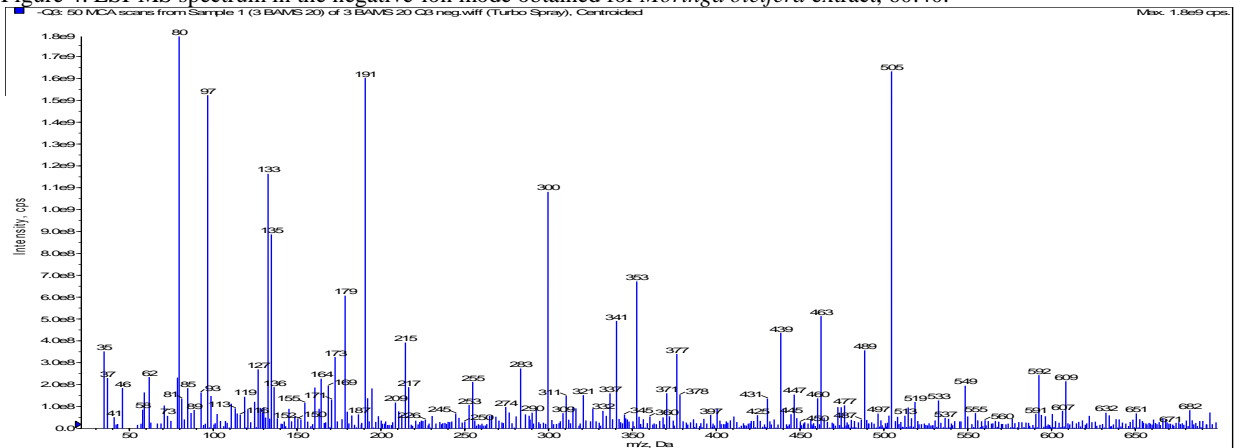

Figure 5. ESI-MS spectrum in the negative-ion mode obtained for *Moringa oleifera* extract, 50:50.

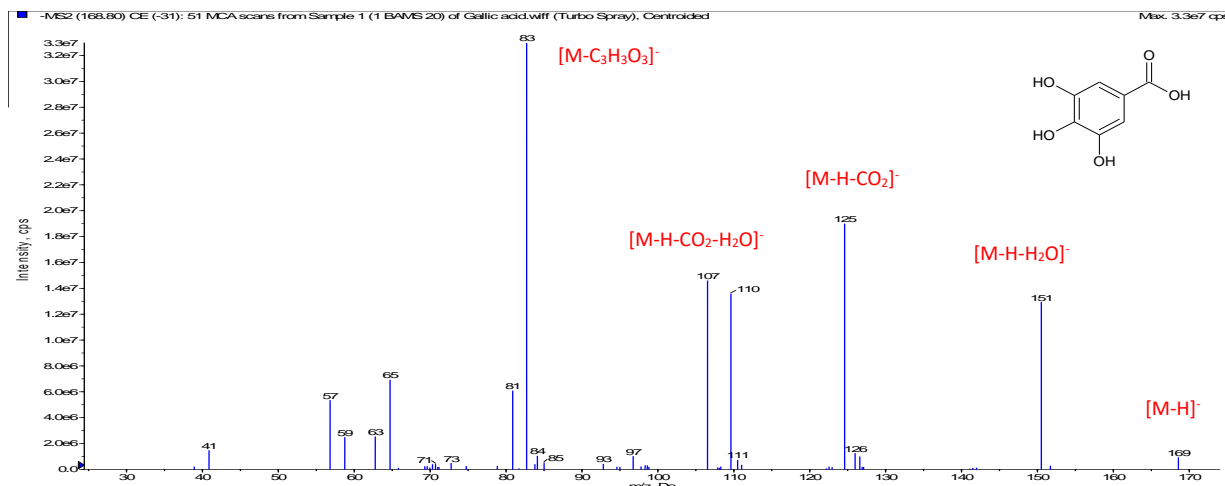

Figure 6. MS<sup>2</sup> fragmentation of Gallic acid.

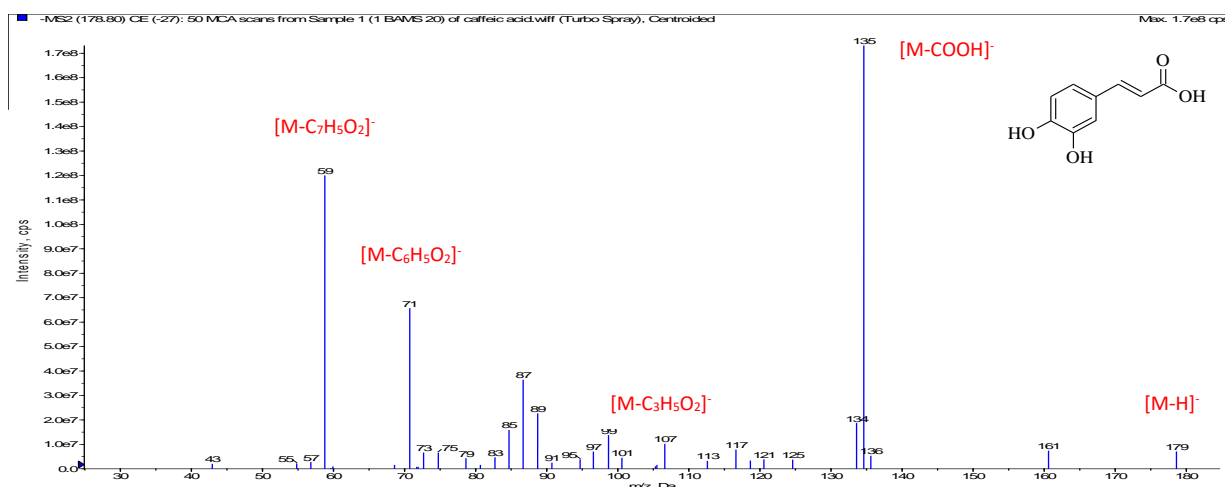

Figure 7. MS<sup>2</sup> fragmentation of Caffeic acid.

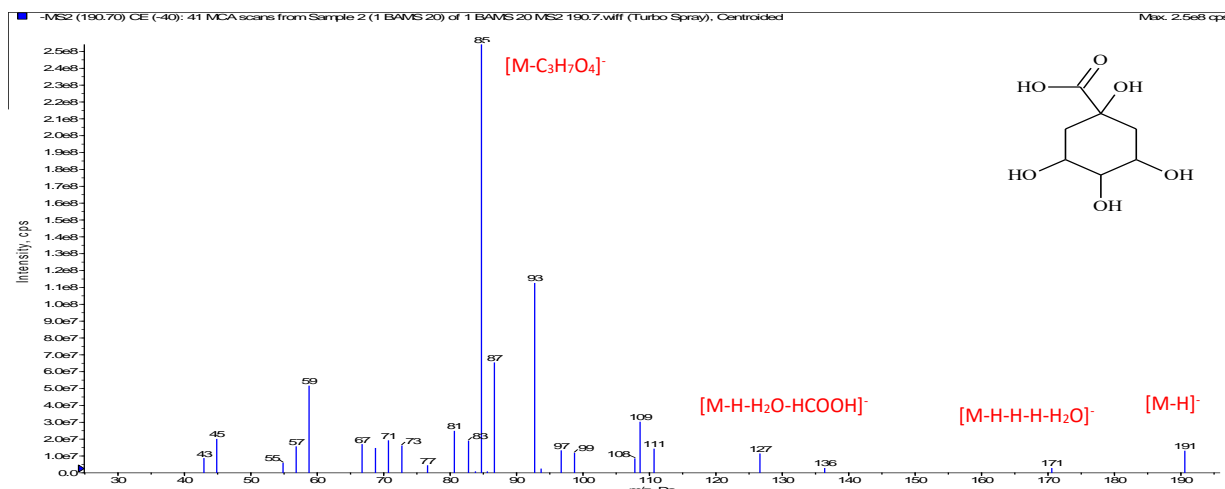

Figure 8. MS<sup>2</sup> fragmentation of Quinic acid .

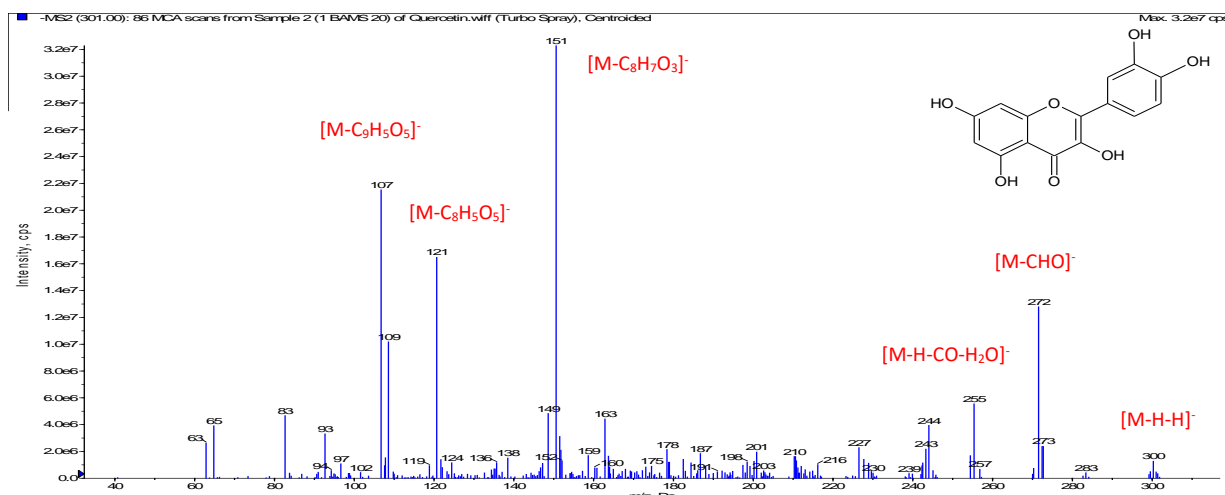

Figure 9. MS<sup>2</sup> fragmentation of Quercetin.

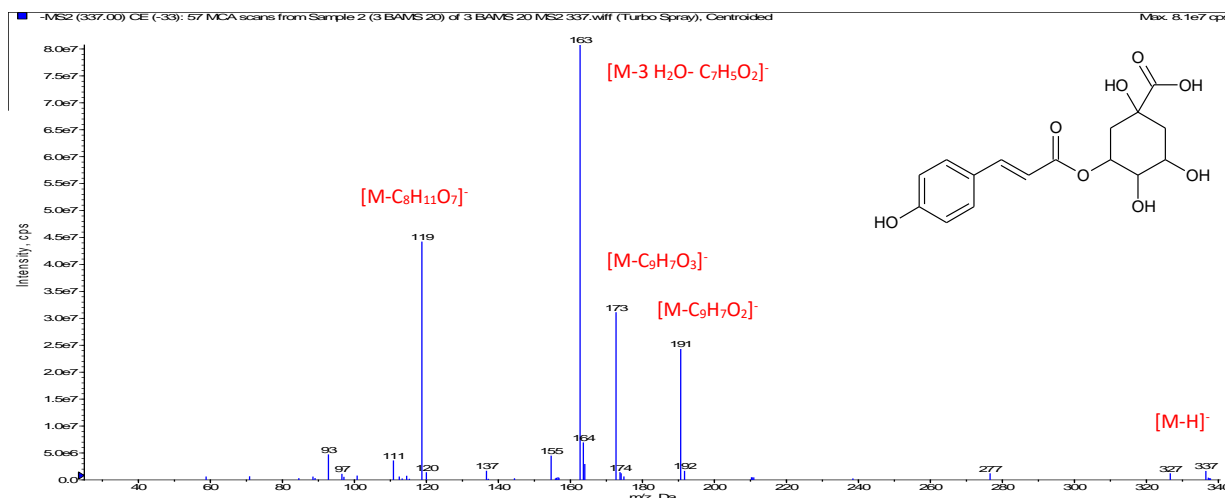

Figure 10. MS<sup>2</sup> fragmentation of p-Coumaroylquinic acid.

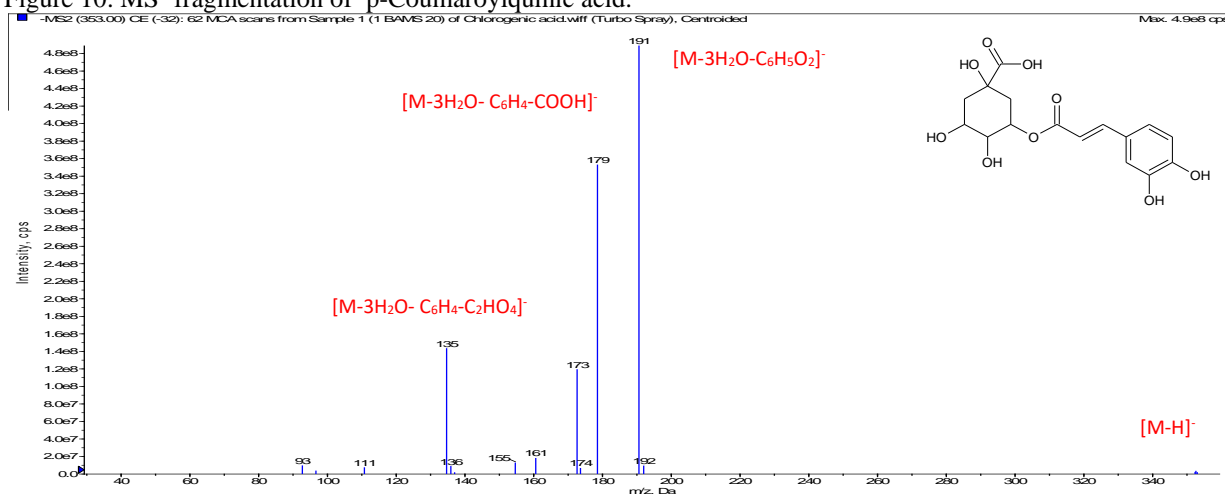

Figure 11. MS<sup>2</sup> fragmentation of Chlorogenic acid.

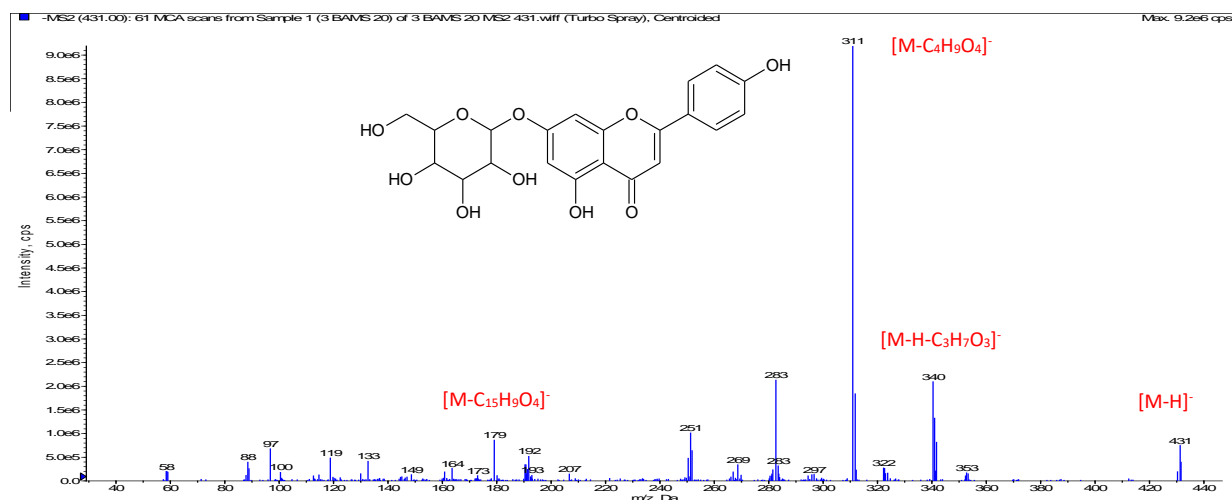

Figure 12. MS<sup>2</sup> fragmentation of Apigenin-glucoside.

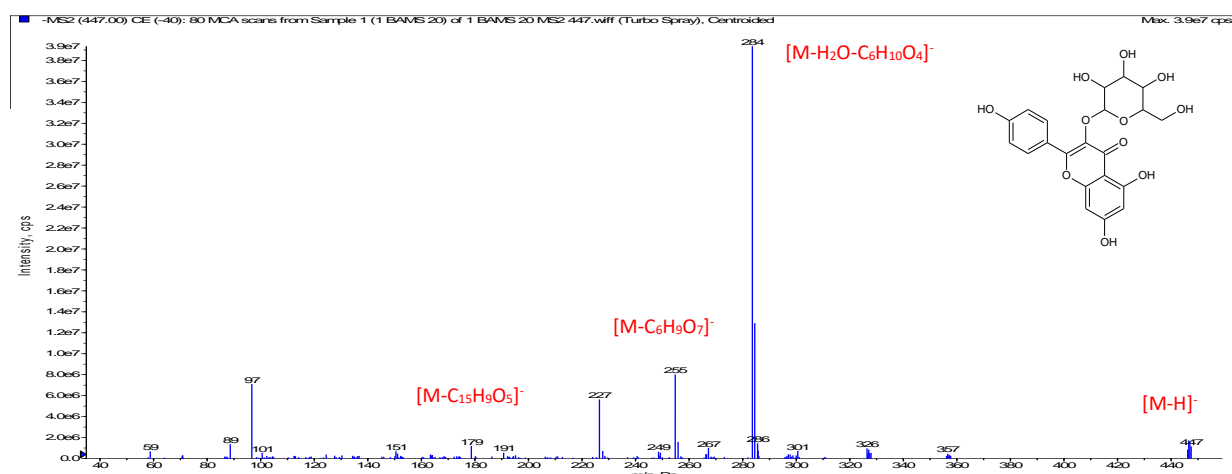

Figure 13. MS<sup>2</sup> fragmentation of Kaempferol-3-O-glucoside.

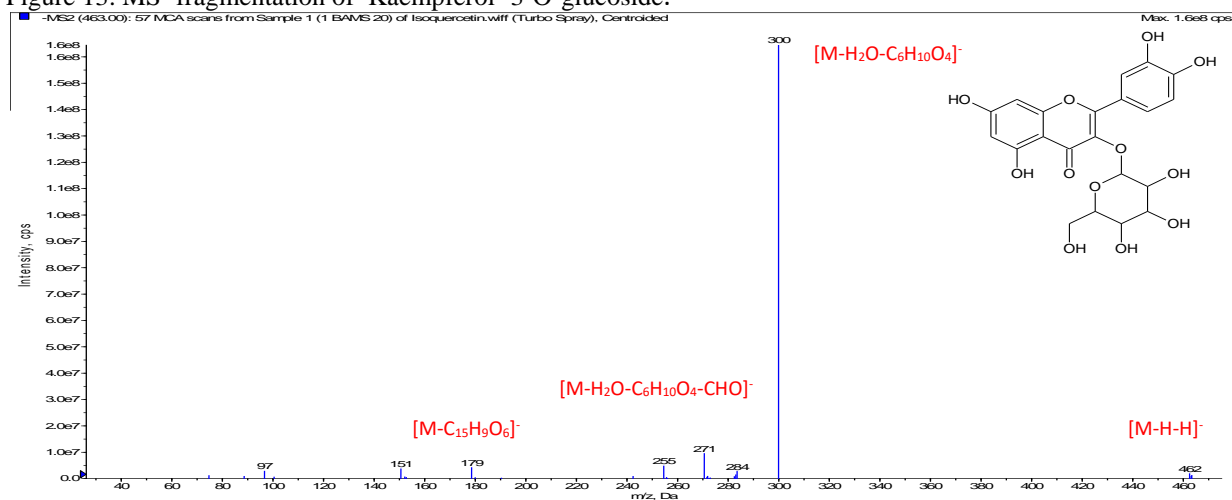

Figure 14. MS<sup>2</sup> fragmentation of Isoquercetin.

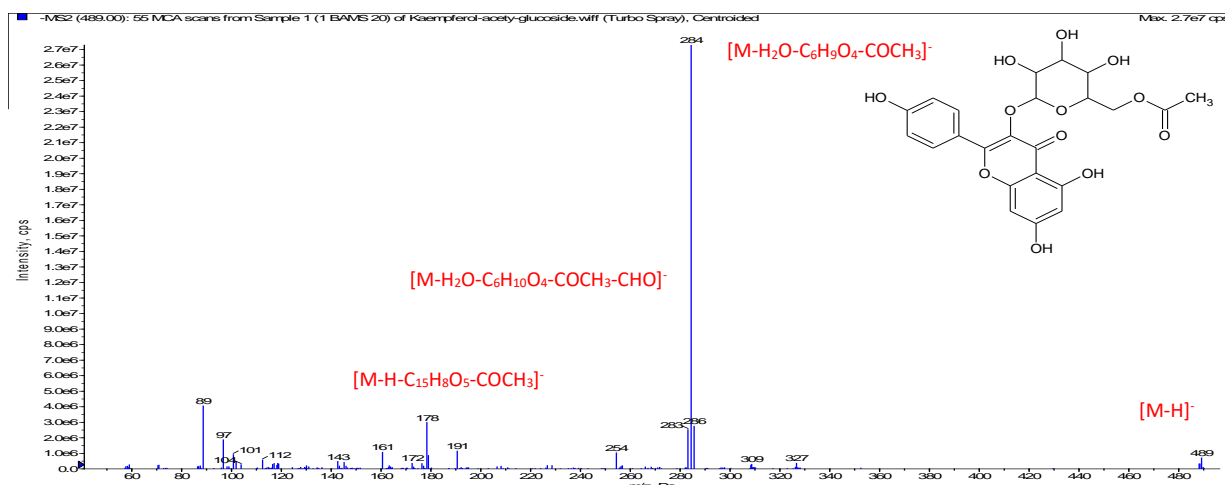

Figure 15. MS<sup>2</sup> fragmentation of Kaempferol-acetyl-glucoside.

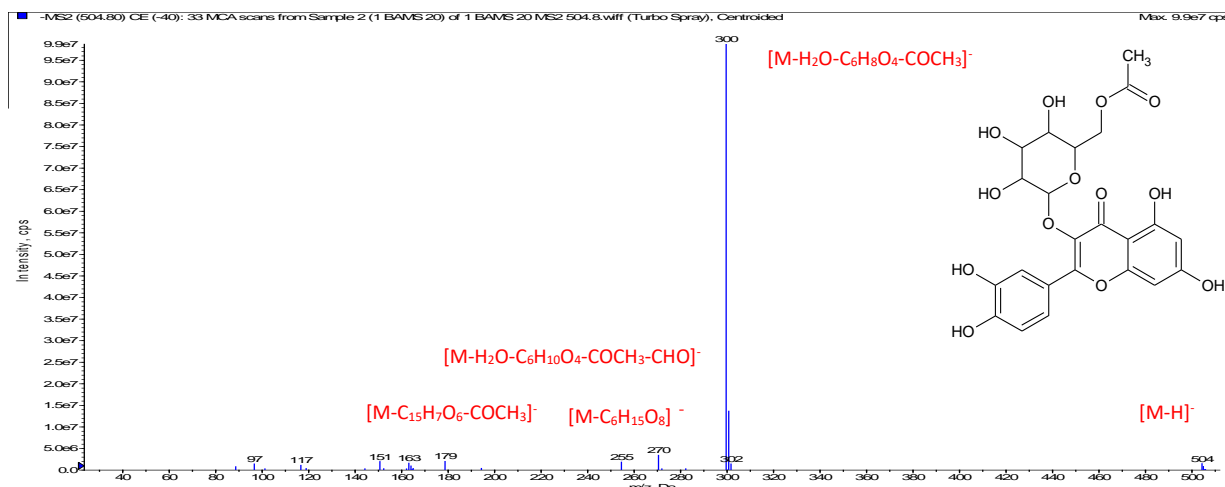

Figure 16. MS<sup>2</sup> fragmentation of Quercetin-acetyl-glucoside.

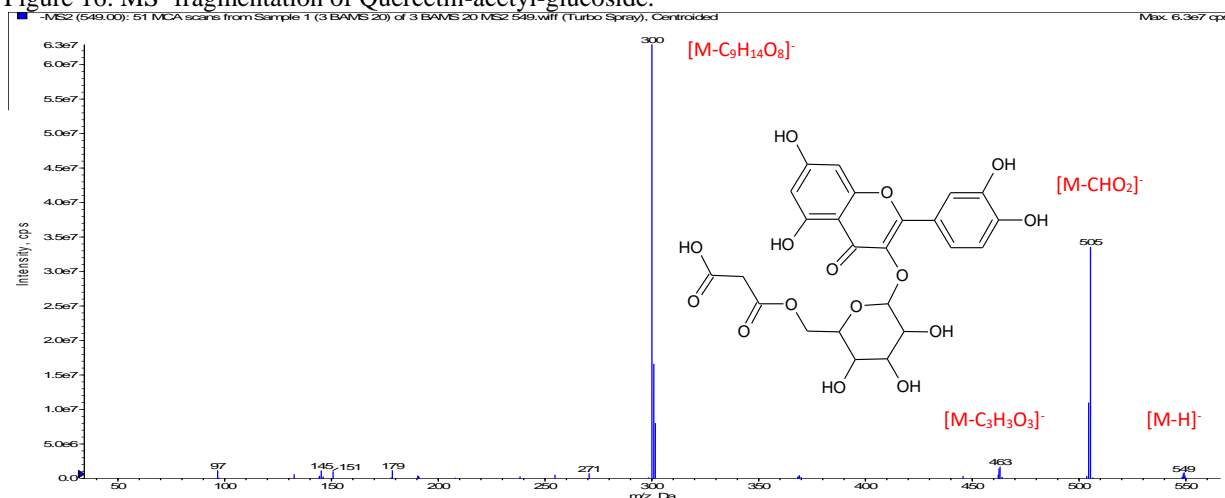

Figure 17. MS<sup>2</sup> fragmentation of quercetin-3-O-malonylhexoside.

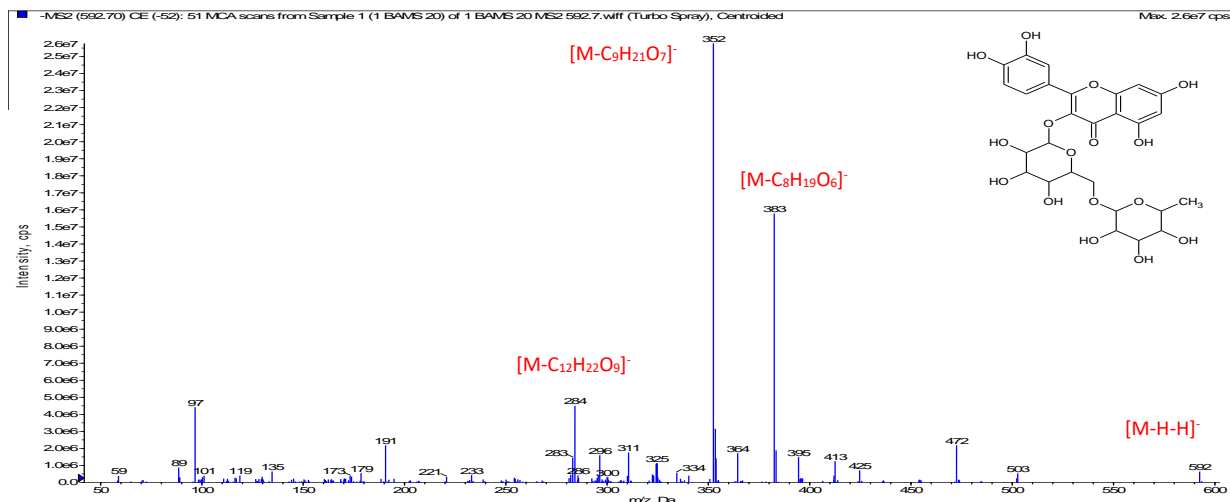

Figure 18. MS<sup>2</sup> fragmentation of Kaempferol-3-O-rutinoside.

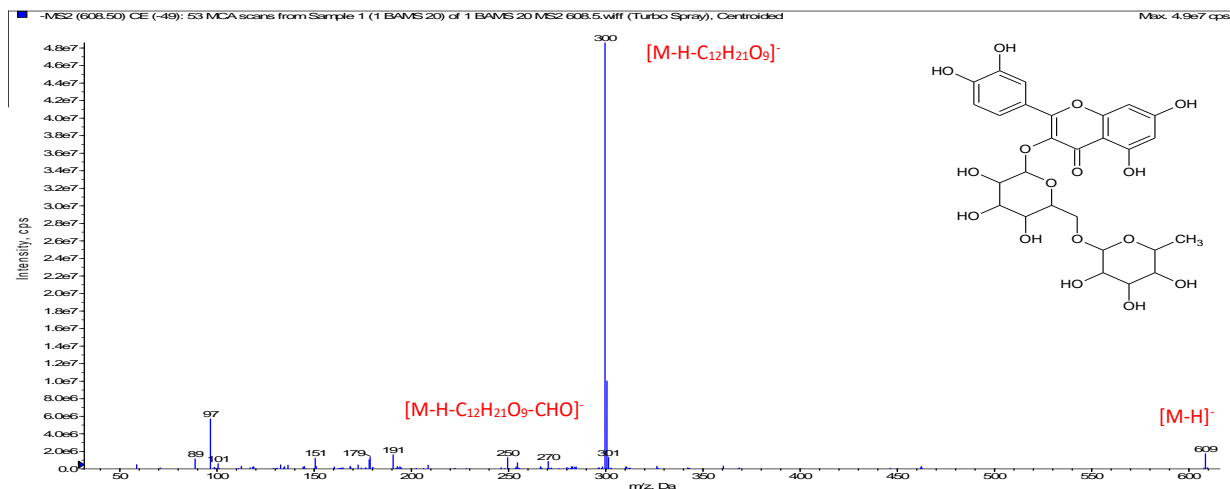

Figure 19. MS<sup>2</sup> fragmentation of Rutin.
